# Supplementary material for: Bayesian Analysis of Individual Level Personality Dynamics
Source: PubMed Central journal article supplement (PMC4949490; doi:10.3389/fpsyg.2016.01065), 2016-07-19

**APPENDIX A**  
**Alternate Models**

The primary contribution of the statistical method in this article is the Bayesian two level mixture component for random effects models. Modelling this mixture structure as a function of personality type and time permits the estimation of personality group level and also individual level posterior probabilities of (a) the occurrence of spiralling behavior and (b) the cut point where spiralling behavior may commence. To stay on point, the main body of the article restricts the discussion to linear mean functions, monotonic either side of the cut point, and Gaussian errors. An advantage of Bayesian methods, coupled with MCMC techniques, is the easy extension to more general models. This allows us to readily fit different models and examine the results, in order to reduce the risk that any findings are a result of model misspecification. We note immediately, in what follows, although some inference at the individual level changes, none of the essential conclusions in the main text are altered, thereby strengthening the support for the ITA.

An equivalent way of writing the two level mixture model in the model development section is for  $j = 1, \dots, J$  individuals and  $t = 1, \dots, T$  trials

- If  $S_j = 0$

$$y_{tj} = \alpha_j + \beta_{1j}f(t) + \varepsilon_{tj}, \quad \varepsilon_{tj} \sim \text{iid} \quad (.4)$$

- If  $S_j = 1$  and conditional on  $c_j = t^*$

$$y_{tj} = \mathbf{x}_t \boldsymbol{\beta}_j + \varepsilon_{tj}, \quad \varepsilon_{tj} \sim \text{iid} \quad (.5)$$

where  $\mathbf{x}_t = (1, f(t) - (f(t) - f(t^*))^+, (f(t) - f(t^*))^+)$ ,

$$(f(t) - f(t^*))^+ = \begin{cases} f(t) - f(t^*) & \text{if } f(t) - f(t^*) > 0 \\ 0 & \text{otherwise,} \end{cases}$$

$\boldsymbol{\beta}_j = (\alpha_j, \beta_{1j}, \beta_{2j})'$  and  $\varepsilon_{tj} \sim N(0, \sigma^2)$ .

Now, write  $\mathbf{z}_j = (1, 0)$  if individual  $j$  is an entity theorist, and  $\mathbf{z}_j = (0, 1)$  if individual  $j$  is an incremental theorist. We expand the model in 4 ways to allow

1. the observational variance to be parameterized according to personality construct so that incremental and entity theorists have separate variances. That is, for each individual  $j$ ,

763  $\sigma_j^2 = \mathbf{z}_j(\sigma_E^2, \sigma_I^2)'$ . Then if individual  $j$  is an entity theorist  $\sigma_j^2 = \sigma_E^2$  and if individual  $j$  is  
 764 an incremental theorist  $\sigma_j^2 = \sigma_I^2$ ,

765 2. the random effects variance parameters to be parametrized according to personality con-  
 766 struct. That is  $\boldsymbol{\tau}_{\beta_1}^2 = (\tau_{\beta_{1E}}^2, \tau_{\beta_{1I}}^2)'$  and  $\boldsymbol{\tau}_{\beta_2}^2 = (\tau_{\beta_{2E}}^2, \tau_{\beta_{2I}}^2)'$ .

767 3. the error structure to have a  $t_3$  distribution,  $\varepsilon_{tj} \sim \sigma_j t_3$  to dampen the effects wide tailed error  
 768 distributions or some extreme values,

4. the learning trajectory to accommodate exponential growth functions where  $f(t) = 1 - \exp(-\lambda t)$  depends upon another model parameter,  $\lambda$ . Functions of the form  $\alpha + \beta_1(1 - \exp(-\lambda t))$ , are often used in the GMM literature because they have the advantage that in addition to being monotonic, an upper and lower limit exists if  $\lambda > 0$ . If  $\beta_1 > 0$  then the lower limit is  $\alpha$  and occurs at time  $t = 0$ , while the upper limit is  $\alpha + \beta_1$  and occurs as  $t \rightarrow \infty$ . Conversely if  $\beta_1 < 0$ , then the upper limit is  $\alpha$ , while  $\alpha + \beta_1$  is the lower limit. The parameter  $\lambda$  controls the rate at which the function approaches its upper/lower limit. The rate parameters have a random effects structure so each  $\lambda_j$  is generated by a Gaussian distribution, the mean of which depends upon the personality classification of individual  $j$ . Also,  $\lambda_j$  is constrained to be positive to ensure that the upper and lower limits exist. We write this as  $\lambda_j \sim N_{C_+}(\mathbf{z}_j(\mu_{\lambda_E}, \mu_{\lambda_I})', \mathbf{z}_j(\tau_{\lambda_E}^2, \tau_{\lambda_I}^2)')$ . Then the expected performance score of individual  $j$  on trial  $t$  conditional on  $S_j = 0$  becomes

$$E(y_{tj}) = \alpha_j + \beta_{1j}(1 - \exp\{-\lambda_j t\})$$

and conditional on  $S_j = 1$  and  $c_j = t^*$

$$E(y_{tj}) = \begin{cases} \alpha_j + \beta_{1j}(1 - \exp\{-\lambda_j t\}) & \text{if } t \leq c_j \\ \alpha_j + \beta_{1j}(1 - \exp\{-\lambda_j t^*\}) + \beta_{2j}(\exp\{-\lambda_j t^*\} - \exp\{-\lambda_j t\}) & \text{if } t > c_j. \end{cases}$$

769 For this choice of function the coefficient,  $\beta_{1j}$ , represents the maximum gain in performance  
 770 before any possible spiral, not the rate of increase in performance. Also, since the rate which  
 771 the asymptote is approached is modeled as a random effect,  $\lambda_j$ , the basis function is not  
 772 common across individuals but rather for individual  $j$  is now  $f_j(t)$ .

### 773 Comparison of Results

774 Figure 7 contains posterior density estimates for the model with  $\varepsilon_{tj} \sim \sigma_j t_3$  and  $f_j(t) = 1 - \exp\{\lambda_j t\}$ .

775 Panel (a) shows the difference in the probability of spiralling behavior between entity theorists and  
 776 incremental theorists,  $\pi_E - \pi_I$ . Panel (a) shows that the probability of spiralling is overwhelmingly  
 777 higher for entity theorists than for incremental theorists and indeed  $\Pr(\pi_E - \pi_I > 0|\mathbf{Y}) \approx 0.98$ .  
 778 Panel (b) shows the difference in maximum performance gain before any possible spiral between  
 779 entity and incremental theorists,  $\mu_{\beta_{1E}} - \mu_{\beta_{1I}}$ . Panel (b) shows that after accounting for potential  
 780 spiralling behavior there exists no obvious difference in maximum gain during increasing perfor-  
 781 mance between the two groups:  $\Pr(\mu_{\beta_{1E}} - \mu_{\beta_{1I}} < 0|\mathbf{Y}) \approx 0.43$ .

782 [FIGURE 7 about here.]

783 Figure 8 shows the individual fitted values when  $f_j(t) = 1 - \exp\{\lambda_j t\}$  and  $\epsilon_{tj} \sim \sigma_j t^3$  and supports the  
 784 results suggested by Figure 7. Figure 8 clearly shows that entity theorists are more likely to exhibit  
 785 spiralling behavior. Moreover, among those individuals whose probability of spiralling is less than  
 786 0.5 (panel (a) Figure 8) there is no obvious difference in performance between entity theorists and  
 787 incremental theorists. Importantly, Figures 8 and 7 support the broad conclusions of the statistical  
 788 analysis in the main text regarding the ITA, suggesting model misspecification has not interfered  
 789 with those aspects of the analysis.

790 [FIGURE 8 about here.]

791 Table 3 provides additional insight to differences at the individual level by reporting the pos-  
 792 terior probability of spiralling for each individual when  $f(t) = t$ ,  $f_j(t) = 1 - \exp\{\lambda_j t\}$  and for  
 793  $\epsilon_{tj} \sim N(0, \sigma_j^2)$  and  $\epsilon_{tj} \sim \sigma_j t^3$ . This table shows that the probability of spiralling varies between  
 794 individuals of the same personality classification and demonstrates the need to model behavior at  
 795 the individual level. Table 3 indicates those individuals who exhibit spiralling behavior – a \* or  
 796 \* indicates an individual classified as an entity theorist or incremental theorist respectively, for  
 797 whom the probability of spiralling is greater than 0.5. The results are fairly consistent, particularly  
 798 for the posterior median of the cut point, although Table 3 shows different combinations of mean  
 799 functions and error distributions have a stronger influence inference at the individual level than the  
 800 group level.

801 [TABLE 3 about here.]

802 For instance, consider:

803 1. Individual 19 has a high probability of spiralling with  $\hat{\Pr}(S_{19} = 1|\mathbf{Y}) = 0.66$  when  $f_j(t) =$   
 804  $1 - \exp\{\lambda_j t\}$  and  $\varepsilon_{tj} \sim N(0, \sigma_j^2)$ . However this probability drops to 0.07 (with  $\hat{c}_{19} = 0$ )  
 805 when  $\varepsilon_{tj} \sim \sigma_j t_3$ . In main article when  $f(t) = t$  and  $\varepsilon_{tj} \sim N(0, \sigma^2)$  then  $\hat{\Pr}(S_{19} = 1|\mathbf{Y}) =$   
 806  $0.99$  and  $\hat{c}_{19} = 9$ . Figure 9 shows the estimated mean function for the exponential growth  
 807 model with  $\varepsilon_{tj} \sim N(0, \sigma_j^2)$  (dashed line) and with  $\varepsilon_{tj} \sim \sigma_j t_3$  (dotted line). This figure shows  
 808 that extreme observations can have a large impact on the inference regarding individual  
 809 spiralling behavior. When  $\varepsilon_{tj} \sim N(0, \sigma_j^2)$  the extreme observation on trial 12, shown as a ‘\*’  
 810 , resulted in the method detecting a spiral. However when the possibility of large deviations  
 811 is explicitly modelled via a  $t_3$  distribution the method does not detect spiralling behavior.

812 [FIGURE 9 about here.]

813 2. In the majority of cases the probability that an individual classified as an incremental theorist  
 814 exhibits spiralling behavior decreases when the mean functions are changed from  $f(t) = t$   
 815 to  $f_j(t) = 1 - \exp\{\lambda_j t\}$ . This is because a linear relationship between performance and  
 816 trial may not be as appropriate as an exponential growth relationship. Perhaps performance  
 817 increases over time at a decreasing rate and if a linear mean function is used the method  
 818 occasionally interprets this decrease in the rate of improvement as the beginning of a spiral.  
 819 Using an exponential growth mean function appears to correct this.

## APPENDIX B

## Model Diagnostics and Simulations

To check the validity of the model we report residual diagnostics and simulation results. Figure 10 shows that the residuals conform to the model assumption of a  $\sigma_j \times t_3$  distribution.

[FIGURE 10 about here.]

Figure 11 displays boxplots of the posterior mean estimates of  $\pi_E - \pi_I$  for 3 simulation settings of  $\pi_E$  and  $\pi_I$ , with 50 replications each. The values of  $\pi_E$  and  $\pi_I$  for each setting appear in Table 4. In all settings  $\mu_{\beta_{IE}} = \mu_{\beta_{II}} = 25$ ; and  $\sigma_E^2 = \sigma_I^2 = 15$ . These values were chosen because they are close to the posterior mean of the parameters estimated from the data.

[TABLE 4 about here.]

In the first simulation setting the probability of spiralling was zero for both entity theorists and incremental theorists. In the second setting the probability of spiralling was 0.5 for both entity theorists and incremental theorists, while in the third setting the probability of spiralling for entity theorists was set to 0.6, while for incremental theorists it was 0.1. The values of the  $\pi$ 's for the third setting were chosen to correspond to the posterior means estimated for the real data. Data were generated from the models given by (.4) and (.5) with  $\epsilon_{ij} \sim \sigma_j \times t_3$ .

Figure 11 shows that the median value of the posterior means is very close to the true value for all simulation settings. Additionally when  $\pi_E = \pi_I = 0.0$  all the estimated posterior means are tightly centred around zero with an interquartile range (IQR) of [-0.02, 0.01]. However when  $\pi_E = \pi_I = 0.5$ , there is more variability in the posterior median estimates and the IQR is [-0.19, 0.11]. This is to be expected because when spiralling behavior is not present our model detects this, and reduces to a single random effects model. However when spiralling is present, the additional uncertainty surrounding the existence and commencement of spiralling behavior induces additional variability in the parameter estimates.

In simulation setting 3, where all parameters were set to their estimated values for the real data, the boxplots show that the model estimates these parameters well, with the true parameter values very close to the median of the simulation estimates.

[FIGURE 11 about here.]

## APPENDIX C

## Priors

This paper uses model averaging to make inference regarding the existence of spiralling behavior. The Markov chain Monte Carlo algorithm we constructed is one of varying dimension; if spiralling behavior is not present then there is a single random effects model for performance behavior. If spiralling behavior is present, then performance behavior is described by a mixture of two random effects models, one before the spiral begins and one afterwards. Thus the dimension of the parameter space changes dependent upon which model for individual performance behavior (spiral or no spiral) is generated at each iteration. In model averaging, where the models are nested, the posterior probability of the model with the lowest dimension will be equal to one if improper priors are used, see S. A. Wood, Kohn, Shively, and Jiang (2002) and Clyde and George (2004) for a full discussion. Furthermore even if the dimension of the parameter space is fixed, placing improper priors on parameters in mixture models can result in improper posterior distributions, because there is always the possibility that no observations are allocated to a component in the mixture. For these reasons we place proper priors all parameters.

**Prior for  $\delta$** 

Our prior for the probability of exhibiting spiralling behavior is

$$\Pr(S_j = 1) = \frac{\exp(z_j \boldsymbol{\delta})}{1 + \exp(z_j \boldsymbol{\delta})}$$

$$p(\boldsymbol{\delta}) \sim N(0, c_\delta I_2),$$

where the parameter  $c_\delta$  determines the how much the prior shrinks the values of  $\delta_0$  and  $\delta_1$  toward zero, and hence controls the difference between an entity theorist spiralling and an incremental theorist spiralling,  $\pi_E - \pi_I$ . If the prior is totally uninformative, i.e.  $c_\delta \rightarrow \infty$ , then we are assuming that the two classifications of personality type have nothing in common regarding the existence of spiralling, and therefore may as well be analysed separately. However as the prior becomes more informative, the probability of spiralling for an individual classified as an entity theorist will approach that of an individual classified as an incremental theorist. In the extreme, if  $c_\delta = 0$  then the probability of spiralling for an incremental theorist and an entity theorists will both be equal 0.5 with probability 1. Figure 12 shows the effect of  $c_\delta$  has on the prior for  $\boldsymbol{\pi} = (\pi_E, \pi_I)$ . In panel (a),  $c_\delta = 1$ , in panel (b)  $c_\delta = 4$  and in panel(c)  $c_\delta = 10$ .

[FIGURE 12 about here.]

876 As this figure shows placing an uninformative prior on  $\delta$ , by letting  $c_\delta \rightarrow \infty$  does not result in an  
 877 uninformative prior for  $\pi$ . As  $c_\delta \rightarrow \infty$  the prior weight for  $\pi_E$  and  $\pi_I$  is concentrated on either 1  
 878 or 0. Hence choosing a large value for  $c_\delta$  overstates the difference in the probability of spiralling  
 879 between entity theorists and incremental theorist. Conversely choosing a small value for  $c_\delta$  un-  
 880 derstates the difference in the probability of spiralling between entity theorists and incremental  
 881 theorist. Choosing  $c_\alpha = 4$ , approximates a flat prior for  $\pi_E$  and  $\pi_I$ .

### 882 **Prior for the $\mu$ 's and $\tau^2$ 's**

883 We now describe the priors the random effects variances and means parametrized by their person-  
 884 ality type. Choosing priors for variance parameters in random effects models can be tricky because  
 885 of the potential for even weakly informative priors to dominate the information contained in the  
 886 likelihood. For example using the proper but “non-informative” conjugate inverse gamma prior,  
 887  $IG(a,b)$ , for a variance parameter, where  $a$  and  $b$  are small, will shrink the posterior distribution  
 888 of the variance towards zero. For a full discussion of the effect of prior distributions for variance  
 889 parameters in random effects models see (Gelman, 2006). The potential of the prior to dominate  
 890 the likelihood is obviously more pronounced if the number of individuals,  $J$ , is small. This is a  
 891 particular problem in this study where the number of individuals who exhibit spiralling behavior  
 892 can be small. This is a particular problem in this study where the number of individuals who ex-  
 893 hibit spiralling behavior can be as small as two or three. To mitigate the potential of the prior to  
 894 dominate the likelihood we follow (Gelman, 2006) and (Browne & Draper, 2006) and place independ-  
 895 ent uniform priors on the standard deviations of the random effects  $\tau \sim U(0, a_\alpha] \times U(0, a_\beta]$ . The  
 896 priors on the hyperparameters are

$$\begin{aligned} \mu_\alpha &\sim N(g_\alpha, h_\alpha), \\ \tau_\alpha^2 &\sim U(0, a_\alpha], \\ \boldsymbol{\mu}_{\beta_1} = (\mu_{\beta_{1E}}, \mu_{\beta_{1I}})' &\sim N_{C_+}(g_{\beta_1} \times \mathbf{1}_2, h_{\beta_1} \times \mathbf{I}_2), \\ \boldsymbol{\mu}_{\beta_2} = (\mu_{\beta_{2E}}, \mu_{\beta_{2I}})' &\sim N_{C_-}(g_{\beta_2} \times \mathbf{1}_2, h_{\beta_2} \times \mathbf{I}_2), \\ \boldsymbol{\tau}_{\beta_1}^2 = (\tau_{\beta_{1E}}^2, \tau_{\beta_{1I}}^2)' &\sim U(0, a_{\beta_1}] \times U(0, a_{\beta_1}], \\ \boldsymbol{\tau}_{\beta_2}^2 = (\tau_{\beta_{2E}}^2, \tau_{\beta_{2I}}^2)' &\sim U(0, a_{\beta_2}] \times U(0, a_{\beta_2}], \end{aligned}$$

897 where  $\mathbf{I}_2$  is the  $2 \times 2$  identity matrix and  $\mathbf{1}_2$  is a vector of ones of length 2. If exponential growth

898 functions are used we have in addition

$$\begin{aligned}\lambda_j &\sim N\left(\mathbf{z}_j(\mu_{\lambda_E}, \mu_{\lambda_I})', \mathbf{z}_j(\tau_{\lambda_E}^2, \tau_{\lambda_I}^2)'\right) \\ (\mu_{\lambda_E}, \mu_{\lambda_I}) &\sim N(g_\lambda \times \mathbf{1}_2, h_\lambda \times \mathbf{I}_2) \\ (\tau_{\lambda_E}^2, \tau_{\lambda_I}^2) &\sim U(0, a_\lambda] \times U(0, a_\lambda]\end{aligned}$$

899 and we adopt the following empirical Bayes approach to set the bounds:

900 1. If  $f(t) = t$  denote the maximum likelihood estimate of the mean function coefficients for  
901 each individual (when  $S_j = 0$ ) as  $(\hat{\alpha}_j, \hat{\beta}_{1j})$  then set

$$\begin{aligned}a_\alpha &= \frac{(\max_j(\hat{\alpha}_j) - \min_j(\hat{\alpha}_j))^2}{4} \\ a_{\beta_1} &= \frac{(\max_j(\hat{\beta}_{1j}) - \min_j(\hat{\beta}_{1j}))^2}{4} \\ a_{\beta_2} &= a_{\beta_1},\end{aligned}$$

902 and  $g_\alpha = \sum_{j=1}^J \hat{\alpha}_j/J$ ,  $g_{\beta_1} = \sum_{j=1}^J \hat{\beta}_{1j}/J$ ,  $g_{\beta_2} = -g_{\beta_1}$ ,  $h_\alpha = a_\alpha/\sqrt{J}$ ,  $h_{\beta_1} = a_{\beta_1}/\sqrt{J}$  and  $h_{\beta_2} =$   
903  $a_{\beta_2}/\sqrt{J}$ .

904 2. If  $f_j(t) = 1 - \exp\{\lambda_j t\}$  denote the maximum likelihood estimate of the mean function coef-  
905 ficients for each individual (when  $S_j = 0$ ) as  $(\hat{\alpha}_j, \hat{\beta}_{1j}, \hat{\lambda}_j)$  then set

$$\begin{aligned}a_\alpha &= \frac{(\max_j(\hat{\alpha}_j) - \min_j(\hat{\alpha}_j))^2}{4} \\ a_{\beta_1} &= \frac{(\max_j(\hat{\beta}_{1j}) - \min_j(\hat{\beta}_{1j}))^2}{4} \\ a_{\beta_2} &= a_{\beta_1}, \\ a_\lambda &= \frac{(\max_j(\hat{\lambda}_j) - \min_j(\hat{\lambda}_j))^2}{4}\end{aligned}$$

906 and  $g_\alpha = \sum_{j=1}^J \hat{\alpha}_j/J$ ,  $g_{\beta_1} = \sum_{j=1}^J \hat{\beta}_{1j}/J$ ,  $g_{\beta_2} = -g_{\beta_1}$ ,  $g_\lambda = \sum_{j=1}^J \hat{\lambda}_j/J$ ,  $h_\alpha = a_\alpha/\sqrt{J}$ ,  $h_{\beta_1} =$   
907  $a_{\beta_1}/\sqrt{J}$  and  $h_{\beta_2} = a_{\beta_2}/\sqrt{J}$  and  $h_\lambda = a_\lambda/\sqrt{J}$ .

908 **Prior for  $\sigma^2$**



<sup>909</sup> We set an uninformative uniform prior for the observational variances contained in  $\sigma^2$ . That is,  
<sup>910</sup>  $p(\sigma_E) \sim U(0, k]$  and  $\sigma_I \sim U(0, k]$  for some large non-negative constant  $k$ .

**APPENDIX D**  
**Sampling Scheme**

911  
912

913 Write  $\mathbf{S} = (S_1, S_2, \dots, S_J)$ ,  $\mathbf{C} = (c_1, c_2, \dots, c_J)$  and for the case when  $S_j = 0$

$$\mathbf{X}_{j|0} = \begin{bmatrix} 1 & f(1) \\ 1 & f(2) \\ \vdots & \vdots \\ 1 & f(T) \end{bmatrix} \quad \text{and} \quad \mathbf{b}_{j|0} = (\alpha_j, \beta_{1j})'$$

and for the case when  $S_j = 1$  and conditioned on  $c_j = t^*$

$$\mathbf{X}_{j|1} = \begin{bmatrix} 1 & f(1) - (f(1) - f(t^*))^+ & (f(1) - f(t^*))^+ \\ 1 & f(2) - (f(2) - f(t^*))^+ & (f(2) - f(t^*))^+ \\ \vdots & \vdots & \vdots \\ 1 & f(T) - (f(T) - f(t^*))^+ & (f(T) - f(t^*))^+ \end{bmatrix} \quad \text{and} \quad \mathbf{b}_{j|1} = (\alpha_j, \beta_{1j}, \beta_{2j})'$$

914 Also, write  $\mathbf{b}_0 = \{\mathbf{b}_{j|0} : S_j = 0\}$ ,  $\mathbf{b}_1 = \{\mathbf{b}_{j|1} : S_j = 1\}$  and  $\mathbf{B} = \{\alpha, \mathbf{b}_1\}$ ,  $\Theta = (\Theta_0, \Theta_1)$ ,  $\Theta_0 =$   
915  $\{\mu_\alpha, \tau_\alpha^2, \mu_{\beta_{1E}}, \mu_{\beta_{1I}}, \tau_{\beta_{1E}}^2, \tau_{\beta_{1I}}^2\} = \{\mu_\alpha, \tau_\alpha^2, \boldsymbol{\mu}_{\beta_1}, \boldsymbol{\tau}_{\beta_1}^2\}$ ,  
916  $\Theta_1 = \{\mu_\alpha, \tau_\alpha^2, \mu_{\beta_{1E}}, \mu_{\beta_{1I}}, \tau_{\beta_{1E}}^2, \tau_{\beta_{1I}}^2, \mu_{\beta_{2E}}, \mu_{\beta_{2I}}, \tau_{\beta_{2E}}^2, \tau_{\beta_{2I}}^2\} = \{\mu_\alpha, \tau_\alpha^2, \boldsymbol{\mu}_{\beta_1}, \boldsymbol{\tau}_{\beta_1}^2, \boldsymbol{\mu}_{\beta_2}, \boldsymbol{\tau}_{\beta_2}^2\}$ . Finally, to im-  
917 plement the MCMC scheme when the  $\varepsilon_{tj}$ 's have a scaled  $t_3$  distribution, define  $\varepsilon_{tj} = e_{tj} \sqrt{3/(\kappa_{tj})}$ ,  
918 where  $\kappa_{tj} \sim \chi_3^2$  and  $e_{tj} \sim N(0, \sigma^2)$ . Then conditional on  $\kappa_{tj}$  the distribution of  $\varepsilon_{tj} | \kappa_{tj}$  is  $N(0, \omega_{tj})$   
919 where  $\omega_{tj} = \sigma^2 3 / \kappa_{tj}$ , and  $\omega_{tj}$  is the  $t^{\text{th}}$ , diagonal element of a diagonal matrix  $\Omega_j$ . Finally, write  
920  $\boldsymbol{\Omega} = \{\Omega_j : j = 1, 2, \dots, J\}$ .

921 The sampling scheme is then

922 1. Sample  $\mathbf{S}$ .

$$p(\mathbf{S} | \mathbf{Y}, \Theta, \boldsymbol{\Omega}) = \prod_{j=1}^J p(S_j | \mathbf{y}_j, \Omega_j, \Theta)$$

923 where

$$p(S_j = 1 | \mathbf{y}_j, \Omega_j, \Theta_1) = \frac{p(\mathbf{y}_j | \Omega_j, \Theta_1, S_j = 1) P(S_j = 1)}{p(\mathbf{y}_j | \Omega_j, \Theta_1, S_j = 1) P(S_j = 1) + p(\mathbf{y}_j | \Omega_j, \Theta_0, S_j = 0) P(S_j = 0)}$$

924

and

$$\begin{aligned}
p(\mathbf{y}_j|\Omega_j, \Theta_1, S_j = 1) &= \frac{\sum_{t=1}^{T-2}}{T-2} \times \\
&\int_{\mathbb{R} \times C_+ \times C_-} p(\mathbf{y}_j|S_j=1, \Omega_j, \Theta_1, c_j=t, \mathbf{b}_{j|1}) p(\mathbf{b}_{j|1}|\Theta_1, S_j=1) d\mathbf{b}_{j|1} \Pr(c_j=t|S_j=1) \\
p(\mathbf{y}_j|\Omega_j, \Theta_0, S_j = 0) &= \int_{\mathbb{R} \times C_+} p(\mathbf{y}_j|S_j=0, \Omega_j, \Theta_0, \mathbf{b}_{j|0}) p(\mathbf{b}_{j|0}|\Theta_0) d\mathbf{b}_{j|0} \quad (.6)
\end{aligned}$$

925

The integrals in (.6) are equal to

(a)

$$\begin{aligned}
p(\mathbf{y}_j|\Omega_j, \Theta_0, S_j = 0) &= \frac{|\mathbf{T}_{j|0}^*|^{1/2}}{(2\pi)^{T/2} |\mathbf{T}_{j|0}|^{1/2} |\Omega_j|^{1/2}} \\
&\times \exp \left\{ -\frac{1}{2} \left( \mathbf{y}'_j \Omega_j^{-1} \mathbf{y}_j + \mathbf{M}'_{j|0} \mathbf{T}_{j|0}^{-1} \mathbf{M}_{j|0} - \mathbf{M}_{j|0}^{*'} \mathbf{T}_{j|0}^{*-1} \mathbf{M}_{j|0}^* \right) \right\} \\
&\times \frac{1 - \Phi \left( (\infty, 0)' | \mathbf{M}_{j|0}^*, \mathbf{T}_{j|0}^* \right)}{1 - \Phi \left( (\infty, 0)' | \mathbf{M}_{j|0}, \mathbf{T}_{j|0} \right)}
\end{aligned}$$

926

where

$$\begin{aligned}
\mathbf{T}_{j|0} &= \begin{bmatrix} \tau_\alpha^2 & 0 \\ 0 & z_j \tau_{\beta_1}^2 \end{bmatrix}, & \mathbf{M}_{j|0} &= \begin{bmatrix} \mu_\alpha \\ z_j \mu_{\beta_1} \end{bmatrix}, \\
\mathbf{T}_{j|0}^* &= \left( \mathbf{X}'_{j|0} \Omega_j^{-1} \mathbf{X}_{j|0} + \mathbf{T}_{j|0}^{-1} \right)^{-1} & \text{and} & \mathbf{M}_{j|0}^* &= \mathbf{T}_{j|0}^* \left( \mathbf{X}'_{1|0} \Omega_j^{-1} \mathbf{y}_j + \mathbf{T}_{j|0}^{-1} \mathbf{M}_{j|0} \right)
\end{aligned}$$

927

(b) and

$$\begin{aligned}
p(\mathbf{y}_j|\Omega_j, \Theta_1, c_j = t, S_j = 1) &= \frac{|\mathbf{T}_{j|1}^*|^{1/2}}{(2\pi)^{T/2} |\mathbf{T}_{j|1}|^{1/2} |\Omega_j|^{1/2}} \\
&\times \exp \left\{ -\frac{1}{2} \left( \mathbf{y}'_j \Omega_j^{-1} \mathbf{y}_j + \mathbf{M}'_{j|1} \mathbf{T}_{j|1}^{-1} \mathbf{M}_{j|1} - \mathbf{M}_{j|1}^{*'} \mathbf{T}_{j|1}^{*-1} \mathbf{M}_{j|1}^* \right) \right\} \\
&\times \frac{\Phi \left( (\infty, \infty, 0)' | \mathbf{M}_{1|j}^*, \mathbf{T}_{1|j}^* \right) - \Phi \left( (\infty, 0, 0)' | \mathbf{M}_{1|j}^*, \mathbf{T}_{1|j}^* \right)}{\Phi \left( (\infty, \infty, 0)' | \mathbf{M}_{1|j}, \mathbf{T}_{1|j} \right) - \Phi \left( (\infty, 0, 0)' | \mathbf{M}_{1|j}, \mathbf{T}_{1|j} \right)}
\end{aligned}$$

where

$$\mathbf{T}_{j|1} = \begin{bmatrix} \tau_\alpha^2 & 0 & 0 \\ 0 & \mathbf{z}_j \boldsymbol{\tau}_{\beta_1}^2 & 0 \\ 0 & 0 & \mathbf{z}_j \tau_{\beta_2}^2 \end{bmatrix}, \quad \mathbf{M}_{j|1} = \begin{bmatrix} \mu_\alpha \\ \mathbf{z}_j \boldsymbol{\mu}_{\beta_1} \\ \mathbf{z}_j \boldsymbol{\mu}_{\beta_2} \end{bmatrix},$$

$$\mathbf{T}_{j|1}^* = \left( \mathbf{X}'_{j|1} \boldsymbol{\Omega}_j^{-1} \mathbf{X}_{j|1} + \mathbf{T}_{j|1}^{-1} \right)^{-1} \quad \text{and} \quad \mathbf{M}_{j|1}^* = \mathbf{T}_{j|1}^* \left( \mathbf{X}'_{j|1} \boldsymbol{\Omega}_j^{-1} \mathbf{y}_j + \mathbf{T}_{j|1}^{-1} \mathbf{M}_{j|1} \right)$$

## 2. Sample $\mathbf{C}$ .

Draw  $\mathbf{C}$  from

$$p(\mathbf{C} | \mathbf{Y}, \boldsymbol{\Theta}, \mathbf{S}, \boldsymbol{\Omega}) = \prod_{j=1}^J p(c_j = t | \boldsymbol{\Theta}, \mathbf{y}_j, S_j, \boldsymbol{\Omega}_j)$$

If  $S_j = 0$ ,  $c_j$  no sampling is required. Conditional on  $S_j = 1$ ,  $c_j$  is drawn according to

$$p(c_j = t | \boldsymbol{\Theta}, \mathbf{y}_j, S_j = 1) = \frac{\frac{1}{T-2} p(\mathbf{y}_j | \boldsymbol{\Theta}_1, c_j = t, S_j = 1, \boldsymbol{\Omega}_j)}{\sum_{t'=1}^{T-2} \frac{1}{T-2} p(\mathbf{y}_j | \boldsymbol{\Theta}_1, c_j = t', S_j = 1, \boldsymbol{\Omega}_j)}$$

where the densities in the denominator and numerator are given in step 1.

## 3. Sample $\mathbf{B}$ .

Draw  $\mathbf{B}$  from

$$p(\mathbf{B} | \mathbf{Y}, \boldsymbol{\Theta}, \mathbf{S}, \mathbf{C}, \boldsymbol{\Omega}) = \prod_{j:S_j=0} p(\mathbf{b}_{j|0} | \mathbf{y}_j, \boldsymbol{\Theta}_0, S_j = 0, \boldsymbol{\Omega}_j) \prod_{j:S_j=1} p(\mathbf{b}_{j|1} | \mathbf{y}_j, \boldsymbol{\Theta}_1, S_j = 1, c_j = t, \boldsymbol{\Omega}_j)$$

Again, from step 1 we can see that  $\mathbf{b}_{j|0}$  is drawn according to  $N(\mathbf{M}_{j|0}^*, \mathbf{T}_{j|0}^*)$  restricted to the region  $\mathbb{R} \times C_+$  and  $\mathbf{b}_{j|1}$  is sampled according to  $N(\mathbf{M}_{j|1}^*, \mathbf{T}_{j|1}^*)$  restricted to the region  $\mathbb{R} \times C_+ \times C_-$ . To draw  $\mathbf{b}_{j|0}$  and  $\mathbf{b}_{j|1}$  we note that linear transformations of truncated normal vectors, and the one-dimensional conditional distributions, are also truncated normal (Rodriguez-Yam, Davis, & Scharf, 2004), so that drawing the elements of  $\mathbf{b}_{j|0}$  and  $\mathbf{b}_{j|1}$ , reduces to drawing a sequence of one-dimensional constrained conditional normal distributions.

## 4. Sample $\boldsymbol{\lambda}$ .

943 If the basis functions are exponential growth curves then draw  $\boldsymbol{\lambda} = (\lambda_1, \dots, \lambda_J)$ , from

$$\begin{aligned} p(\boldsymbol{\lambda} | \mathbf{Y}, \mathbf{S}, \mathbf{C}, \mathbf{B}, \boldsymbol{\Omega}, \mu_\lambda, \tau_\lambda^2) &= \prod_{j=1}^J p(\lambda_j | \mathbf{y}_j, S_j = s_j, c_j, \mathbf{b}_{j|s_j}, \boldsymbol{\Omega}_j, \mu_\lambda, \tau_\lambda^2) \\ &= \prod_{j=1}^J p(\mathbf{y}_j | \lambda_j, S_j = s_j, c_j, \mathbf{b}_{j|s_j}, \boldsymbol{\Omega}_j) p(\lambda_j | \mu_\lambda, \tau_\lambda^2) \end{aligned}$$

944 using a Metropolis-Hastings step. If the current value of  $\lambda_j$  in the chain is  $\lambda_j^c$  then a new  
 945 value,  $\lambda_j^N$ , is drawn from a proposal density  $q(\lambda_j) \sim N_{C_\lambda}(\hat{\lambda}_j, \hat{\Sigma}_{\lambda_j})$ . The value of  $\hat{\lambda}_j$  is the  
 946 value that maximizes  $l(\lambda_j)$  where  $l(\lambda_j) = \log(p(\mathbf{y}_j | \lambda_j, S_j = s_j, c_j, \mathbf{b}_{j|s_j}, \boldsymbol{\Omega}_j) p(\lambda_j | \mu_\lambda, \tau_\lambda^2))$ , and  
 947  $\hat{\Sigma}_{\lambda_j}$  is equal to the inverse of the second derivative of  $l(\lambda_j)$  evaluated at  $\hat{\lambda}_j$ . If  $\lambda_j^N > 0$ ,  $\lambda_j^N$  is  
 948 accepted with the usual Metropolis-Hastings probability, otherwise retain  $\lambda_j^c$ .

949 5. Sample  $(\sigma_E^2, \sigma_I^2)$ .

950 (a) When  $\varepsilon_{tj} \sim N(0, (\sigma_E^2, \sigma_I^2) \mathbf{z}_j)$  then draw  $(\sigma_E^2, \sigma_I^2)$  from

$$p(\sigma_E^2, \sigma_I^2 | \mathbf{Y}, \mathbf{B}, \mathbf{S}, \mathbf{C}) = p(\sigma_E^2 | \mathbf{Y}, \mathbf{B}, \mathbf{S}, \mathbf{C}) p(\sigma_I^2 | \mathbf{Y}, \mathbf{B}, \mathbf{S}, \mathbf{C})$$

where

$$\sigma_E^2 \sim IG \left( \frac{J_E}{2} - 1, \frac{\sum_{\{j: \mathbf{z}_j = (1,0)'\}} (\mathbf{y}_j - \hat{\mathbf{y}}_j)' (\mathbf{y}_j - \hat{\mathbf{y}}_j)}{2} \right) \mathbb{I}\{\sigma_E^2 \leq k\},$$

951

$$\mathbb{I}\{\sigma_E^2 \leq k\} = \begin{cases} 0 & \text{if } \sigma_E^2 > k \\ 1 & \text{if } \sigma_E^2 \leq k, \end{cases}$$

952

$$\hat{\mathbf{y}}_j = \begin{cases} \mathbf{X}_{j|0} \mathbf{b}_{j|0} & \text{if } S_j = 0 \\ \mathbf{X}_{j|1} \mathbf{b}_{j|1} & \text{if } S_j = 1 \text{ and } c_j = t^* \end{cases}$$

953

and  $J_E = \sum_{j=1}^J \mathbb{I}\{\mathbf{z}_j = (1,0)'\}$ . Similarly, draw  $\sigma_I^2$  with  $\mathbf{z}_j = (0,1)'$ .

954

(b) If  $\varepsilon_{jt} \sim \sigma_j t_3$  then draw  $\sigma_j^2$  by

955

i. Generating  $\kappa_{tj}$ , from a Gamma distribution  $G(u_a, u_b)$  with  $u_a = 2$  and

$$u_b = \frac{1}{2} \left( 1 + \left( \frac{y_{tj} - \mathbf{X}_{tj|S_j} \mathbf{b}_{j|S_j}}{\sigma \sqrt{3}} \right)^2 \right)$$

956

where  $\mathbf{X}_{tj|S_j}$  is a row vector denoting the  $t$ th row of  $\mathbf{X}_{j|S_j}$  for  $t = 1, \dots, T$  and

957

$j = 1, \dots, J$ .

- 958 ii. Generating  $\sigma^2 = (\sigma_E^2, \sigma_I^2)\mathbf{z}_j$ .  $\sigma_E^2$  and  $\sigma_I^2$  have inverse gamma distribution with  
 959 parameters  $(u_E, v_E)$  and  $(u_I, v_I)$  respectively. To draw  $\sigma_E^2$ , we note  $u_E = J_E/2 - 1$   
 960 where  $J_E = \sum_{j=1}^J \mathbb{I}\{\mathbf{z}_j = (1, 0)'\}$  and

$$v_E = \frac{1}{2} \sum_{\{j:\mathbf{z}_j=(1,0)'\}} \sum_{t=1}^T \left( \frac{y_{tj} - \mathbf{X}_{tj} \mathbf{S}_j \mathbf{b}_j \mathbf{S}_j}{\sqrt{\kappa_{tj}/3}} \right)^2$$

961  $\sigma_I^2$  is drawn in a similar fashion.

- 962 6. Sample  $\boldsymbol{\delta} = (\delta_0, \delta_1)$ .

Draw  $\boldsymbol{\delta}$  from

$$p(\boldsymbol{\delta} | \mathbf{Y}, \mathbf{C}, \mathbf{B}, \mathbf{S}) = p(\boldsymbol{\delta} | \mathbf{S}) \propto p(\mathbf{S} | \boldsymbol{\delta}) p(\boldsymbol{\delta}),$$

963 where  $p(\boldsymbol{\delta})$  is the prior distribution of  $\boldsymbol{\delta}$  discussed in the main text. We use a Metropolis-  
 964 Hastings method for this step. If the current value of  $\boldsymbol{\delta}$  in the chain is  $\boldsymbol{\delta}^c$  then a new value,  $\boldsymbol{\delta}^N$ ,  
 965 is drawn from a proposal density  $q(\boldsymbol{\delta}) \sim N(\hat{\boldsymbol{\delta}}, \hat{\Sigma})$ , where  $\hat{\boldsymbol{\delta}}$  is the value of  $\boldsymbol{\delta}$  which maximizes  
 966  $\log [p(\mathbf{S} | \boldsymbol{\delta}) p(\boldsymbol{\delta})]$ , and  $\hat{\Sigma}$  is equal to the inverse of the second derivative of  $\log [p(\mathbf{S} | \boldsymbol{\delta}) p(\boldsymbol{\delta})]$   
 967 evaluated at  $\hat{\boldsymbol{\delta}}$ . This new value is accepted with the usual probability.

- 968 7. Sample  $(\mu_\alpha, \boldsymbol{\mu}_{\beta_1}, \boldsymbol{\mu}_{\beta_2})$ .

969 First, draw  $\mu_\alpha$  from

$$\mu_\alpha | \mathbf{B}, \tau_\alpha^2 \sim N \left( \frac{\tau_\alpha^2 g_\alpha + h_\alpha \sum_{j=1}^J \alpha_j}{J \times h_\alpha + \tau_\alpha^2}, \frac{J \times h_\alpha + \tau_\alpha^2}{\tau_\alpha^2 h_\alpha} \right)$$

970 then draw  $(\mu_{\beta_{1E}}, \mu_{\beta_{2E}})$  from

$$p(\mu_{\beta_{1E}}, \mu_{\beta_{2E}} | \mathbf{Y}, \mathbf{B}, \tau_{\beta_{1E}}^2, \tau_{\beta_{2E}}^2) = p(\mu_{\beta_{1E}} | \mathbf{B}, \tau_{\beta_{1E}}^2) \times p(\mu_{\beta_{2E}} | \mathbf{B}, \tau_{\beta_{2E}}^2)$$

971 where

$$\begin{aligned}\mu_{\beta_{1E}} | \mathbf{B}, \tau_{\beta_{1E}}^2 &\sim N_{C_+} \left( \frac{\tau_{\beta_{1E}}^2 g_{\beta_1} + h_{\beta_1} \sum_{\{j:z_j=(1,0)\}} \beta_{1j}}{J_E h_{\beta_1} + \tau_{\beta_{1E}}^2}, \frac{J_E h_{\beta_1} + \tau_{\beta_{1E}}^2}{\tau_{\beta_{1E}}^2 h_{\beta_1}} \right) \\ \mu_{\beta_{2E}} | \mathbf{B}, \tau_{\beta_{2E}}^2 &\sim N_{C_-} \left( \frac{\tau_{\beta_{2E}}^2 g_{\beta_2} + h_{\beta_2} \sum_{\{j:z_j=(1,0), S_j=1\}} \beta_{2j}}{J_{E_s} h_{\beta_2} + \tau_{\beta_{2E}}^2}, \frac{J_{E_s} h_{\beta_2} + \tau_{\beta_{2E}}^2}{\tau_{\beta_{2E}}^2 h_{\beta_2}} \right),\end{aligned}$$

972  $J_E = \sum_{j=1}^J \mathbb{I}\{z_j = (1, 0)'\}$  and  $J_{E_s} = \sum_{j=1}^J \mathbb{I}\{z_j = (1, 0)', S_j = 1\}$ . Then draw  $(\mu_{0I}, \mu_{\beta_{1I}}, \mu_{\beta_{2I}})'$   
973 in a similar fashion but  $z_j = (0, 1)$ .

974 8. Sample  $(\tau_{\alpha}^2, \tau_{\beta_{1I}}^2, \tau_{\beta_{2I}}^2, \tau_{\beta_{1E}}^2, \tau_{\beta_{2E}}^2)'$ .

975 First, draw  $\tau_{\alpha}^2$  from  $p(\tau_{\alpha}^2 | \mathbf{B}, \mu_{\alpha})$ , then draw,  $(\tau_{\beta_{1E}}^2, \tau_{\beta_{2E}}^2)'$  from

$$p(\tau_{\beta_{1E}}^2, \tau_{\beta_{2E}}^2 | \mathbf{Y}, \mathbf{B}, \mu_{\beta_{1E}}, \mu_{\beta_{2E}}) = p(\tau_{\beta_{1E}}^2 | \mathbf{B}, \mu_{\beta_{1E}}) \times p(\tau_{\beta_{2E}}^2 | \mathbf{B}, \mu_{\beta_{2E}}).$$

976 where

$$\begin{aligned}\tau_{\alpha}^2 | \mathbf{B}, \mu_{\alpha} &\sim IG \left( J/2 - 1, \frac{\sum_{j=1}^J (\alpha_j - \mu_{\alpha})^2}{2} \right) \mathbb{I}\{\tau_{\alpha}^2 \leq a_{\alpha}\} \\ \tau_{1E}^2 | \mathbf{B}, \mu_{\beta_{1E}} &\sim IG \left( J_E/2 - 1, \frac{\sum_{\{j:z_j=(1,0)\}} (\beta_{1j} - \mu_{\beta_{1E}})^2}{2} \right) \mathbb{I}\{\tau_{1E}^2 \leq a_{\beta_1}\} \\ \tau_{2E}^2 | \mathbf{B}, \mu_{\beta_{2E}} &\sim IG \left( J_{E_s}/2 - 1, \frac{\sum_{\{j:z_j=(1,0), S_j=1\}} (\beta_{2j} - \mu_{\beta_{2E}})^2}{2} \right) \mathbb{I}\{\tau_{1E}^2 \leq a_{\beta_1}\}\end{aligned}$$

977 where  $J_E, J_{E_s}$  are as defined in step 7, the function  $\mathbb{I}\{\cdot\}$  is as defined in step 5 and  $a_{\alpha}, a_{\beta_1}, a_{\beta_2}$   
978 are calculated as described in the Priors section. Then draw  $(\tau_{\beta_{1I}}^2, \tau_{\beta_{2I}}^2)$  in a similar fashion  
979 but with  $z_j = (0, 1)$ .

980 9. If the basis functions are exponential growth curves then  $\mu_{\lambda}$  and  $\tau_{\lambda}^2$  are drawn as in steps 7  
981 and 8 above with the appropriate constraints.

TABLE 3

Estimate of posteriors means for individual probability of spiralling,  $\hat{\Pr}(S_j = 1|\mathbf{Y})$  for all individuals classified as entity theorists (red) and as incremental theorists (blue) for three basis functions and two type of error distribution. An \* or \* indicates an individual classified as an entity theorist or incremental theorist respectively for whom the probability of spiralling is greater than 0.5. An estimate of the median value of the point at which the spiral begins,  $c_j$ , is given in the last column for the case when  $f_j(t) = 1 - \exp\{-\lambda_j t\}$ .

| Individual | $f(t) = t$ |        | $f_j(t) = 1 - \exp\{-\lambda_j t\}$ |        | $\hat{c}_j$ |
|------------|------------|--------|-------------------------------------|--------|-------------|
|            | Normal     | $t_3$  | Normal                              | $t_3$  |             |
| 1          | 0.06       | 0.06   | 0.01                                | 0.01   | 0           |
| 2          | 0.88 *     | 0.44   | 0.99 *                              | 0.97 * | 5           |
| 3          | 0.27       | 0.28   | 0.22                                | 0.09   | 0           |
| 4          | 0.03       | 0.06   | 0.01                                | 0.01   | 0           |
| 5          | 0.16       | 0.25   | 0.20                                | 0.09   | 0           |
| 6          | 0.01       | 0.03   | 0.00                                | 0.00   | 0           |
| 7          | 0.05       | 0.08   | 0.01                                | 0.01   | 0           |
| 8          | 0.10       | 0.11   | 0.02                                | 0.03   | 0           |
| 9          | 0.01       | 0.04   | 0.01                                | 0.00   | 0           |
| 10         | 0.20       | 0.37   | 0.22                                | 0.07   | 0           |
| 11         | 0.06       | 0.04   | 0.00                                | 0.00   | 0           |
| 12         | 0.12       | 0.13   | 0.02                                | 0.03   | 0           |
| 13         | 0.11       | 0.24   | 0.15                                | 0.04   | 0           |
| 14         | 0.76 *     | 0.68 * | 0.77 *                              | 0.93 * | 4           |
| 15         | 0.22       | 0.22   | 0.05                                | 0.14   | 0           |
| 16         | 0.55 *     | 0.58 * | 0.54 *                              | 0.66 * | 4           |
| 17         | 0.05       | 0.12   | 0.02                                | 0.02   | 0           |
| 18         | 0.98*      | 0.87*  | 0.97*                               | 1.00*  | 3           |
| 19         | 0.97*      | 0.46*  | 0.66*                               | 0.07   | 0           |
| 20         | 0.96*      | 0.86*  | 0.95*                               | 0.99*  | 3           |
| 21         | 1.00*      | 0.92*  | 1.00*                               | 0.97*  | 4           |
| 22         | 0.99*      | 0.97*  | 1.00*                               | 1.00*  | 3           |
| 23         | 0.01       | 0.05   | 0.01                                | 0.01   | 0           |
| 24         | 0.59*      | 0.66*  | 0.59*                               | 0.75*  | 3           |
| 25         | 0.03       | 0.11   | 0.01                                | 0.02   | 0           |
| 26         | 1.00*      | 0.98*  | 1.00*                               | 1.00*  | 2           |
| 27         | 0.04       | 0.23   | 0.01                                | 0.01   | 0           |
| 28         | 0.97 *     | 0.97 * | 1.00 *                              | 0.94 * | 1           |
| Average    | 0.63       | 0.68   | 0.64                                | 0.61   |             |
| Average    | 0.17       | 0.19   | 0.14                                | 0.14   |             |



**TABLE 4**  
Values of  $\pi_E$  and  $\pi_I$  used in simulation settings.

| Parameter       | Setting Number |     |     |
|-----------------|----------------|-----|-----|
|                 | 1              | 2   | 3   |
| $\pi_E$         | 0.0            | 0.5 | 0.6 |
| $\pi_I$         | 0.0            | 0.5 | 0.1 |
| $\pi_E - \pi_I$ | 0.0            | 0.0 | 0.5 |

**FIGURE 7**

Estimated posterior densities for the model  $f_j(t) = 1 - \exp\{-\lambda_j t\}$  and  $\varepsilon \sim \sigma_j t_3$ . Panel (a) displays the difference in the probability of spiralling between entity theorists and incremental theorists,  $\pi_E - \pi_I$ . Panel (b) shows the difference in maximal performance gain between entity and incremental theorists,  $\mu_{\beta_{1E}} - \mu_{\beta_{1I}}$ .

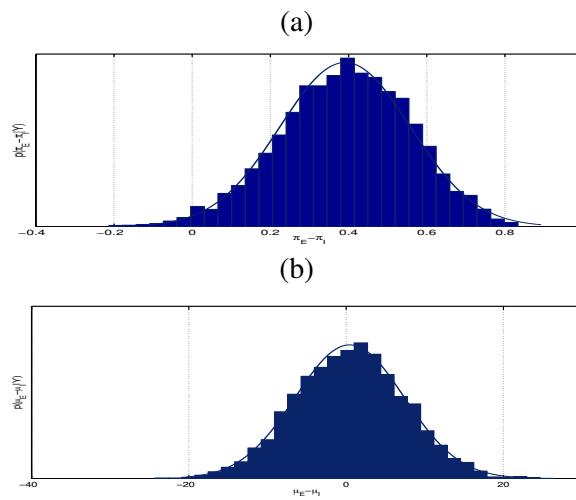

**FIGURE 8**

Panel (a); Posterior mean of all individual performance curves for entity theorists (**red**) and incremental theorists (**blue**) for the model with  $f_j(t) = 1 - \exp\{-\lambda_j t\}$  and  $\varepsilon_{jt} \sim \sigma t_3$ . Panels (b) and (c) are similar plots for individuals for whom the probability of spiralling is less than 0.5 (panel (b)) and greater than 0.5 (panel (c)).

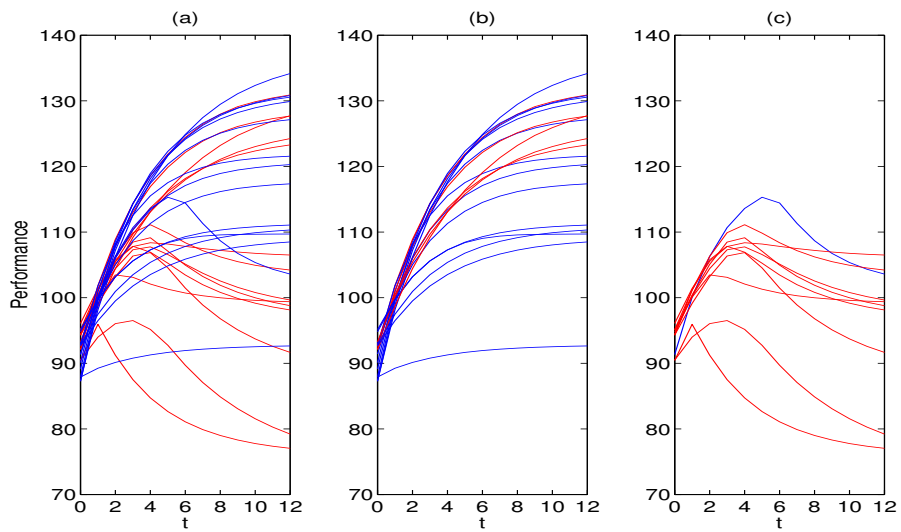

**FIGURE 9**

Observed performance of individual 19 and posterior mean of regression line when  $\varepsilon_{jt} \sim N(0, \sigma_j^2)$ , dashed (- - -), and when  $\varepsilon_{jt} \sim \sigma_j t^3$ , dotted (...), for  $f(t)_j = 1 - \exp\{-\lambda_j t\}$ .

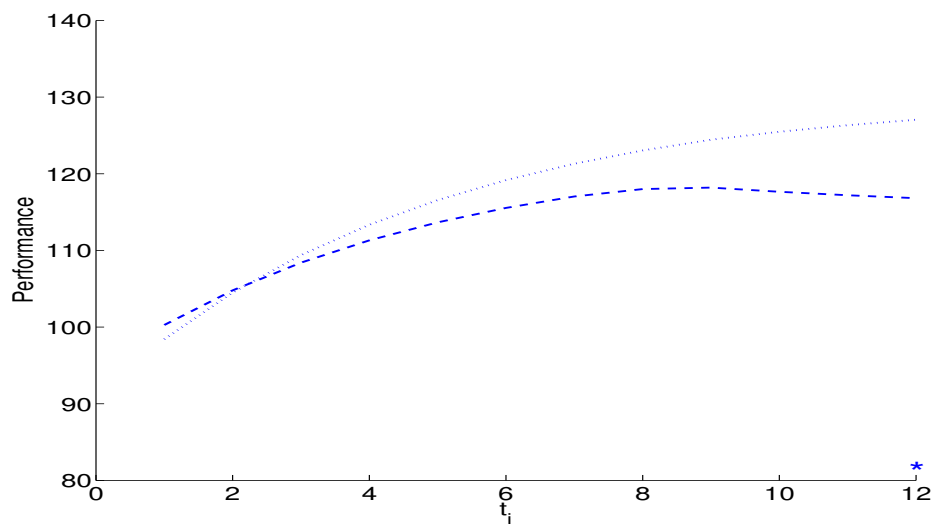

**FIGURE 10**

Histogram of residuals for the model given by (.4) and (.5) with  $\varepsilon_{jt} \sim \sigma_j \times t_3$ , and  $f_j(t) = 1 - \exp\{-\lambda_j t\}$ , overlaid with the density function of a  $t_3$ .

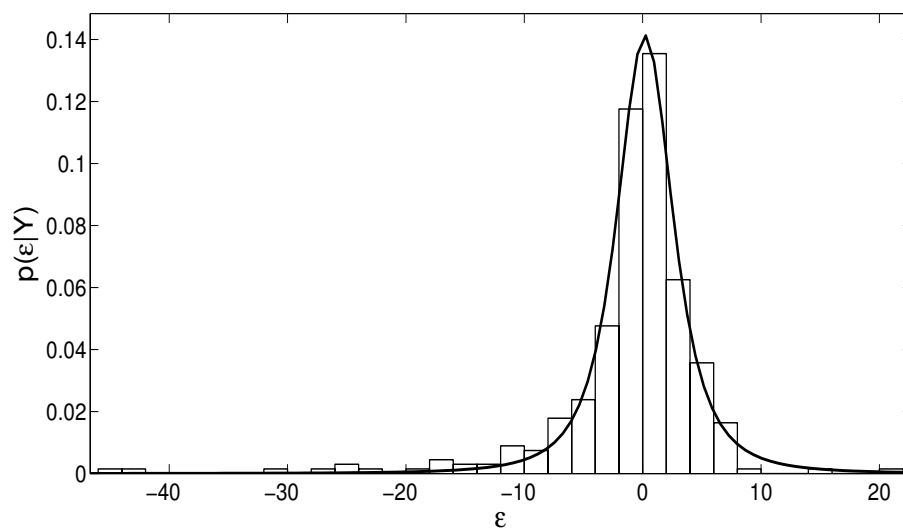

**FIGURE 11**

Boxplots of posterior mean estimates for 3 simulation settings with 50 realisations in each simulation. In each panel, the left boxplot corresponds to the simulation when  $\pi_E = \pi_I = 0$ , the middle boxplot corresponds to the simulation when  $\pi_E = \pi_I = 0.5$  and the right boxplot corresponds to the simulation when  $\pi_E = 0.6$  and  $\pi_I = 0.1$ . Panel (a) reports posterior mean estimates of  $\pi_E - \pi_I$ . Panel (b) reports posterior mean estimates of  $\mu_{\beta_{1E}} - \mu_{\beta_{1I}}$ , Panel (c) reports posterior mean estimates of  $\sigma_E/\sigma_I$ . The horizontal blue dashed line is true values.

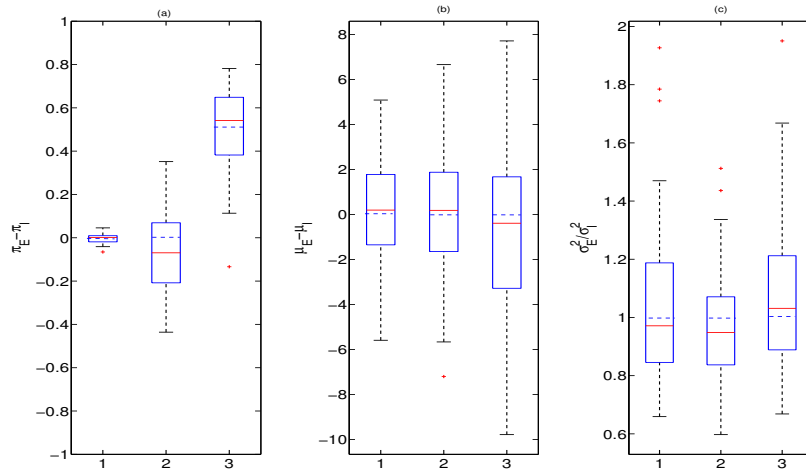

**FIGURE 12**

Effect of  $c_\delta$  on the prior for  $\boldsymbol{\pi} = (\pi_E, \pi_I)$ . In panel (a),  $c_\delta = 1$ , in panel (b)  $c_\delta = 4$ , and in panel(c)  $c_\delta = 10$ .

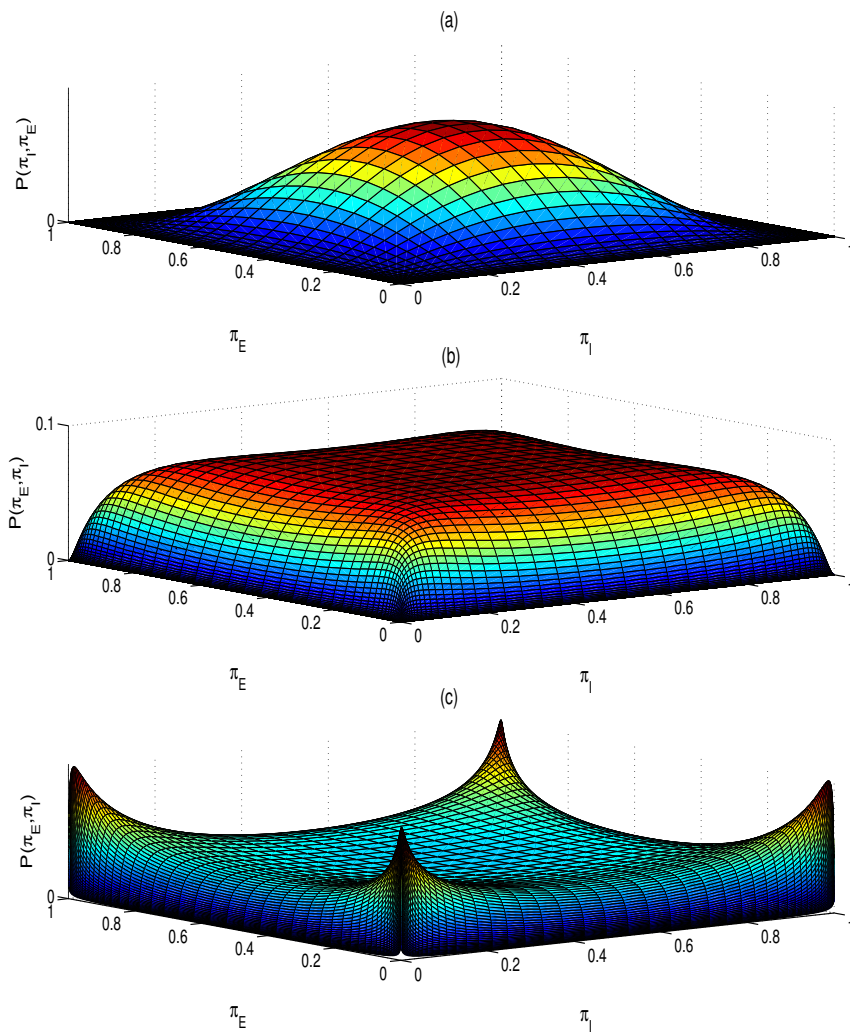

Supplement: DataSheet1.pdf [file DataSheet1.pdf]
